# Supplementary material
Source: PubMed Central journal article supplement (PMC5748506)
Supplement: 10.1194_P078634_jlr.P078634-1.pdf [file 10.1194_P078634_jlr.P078634-1.pdf]

**Supplemental Table S1.** Effect of the *MTNR1B* rs10830963 genetic variant on changes in lipid metabolism traits in response to a low-/high-fat diet at 2 years of diet intervention among white subjects

|                                   | Low fat (n=240) |       | High fat (n=235) |      | p interaction |
|-----------------------------------|-----------------|-------|------------------|------|---------------|
|                                   | $\beta$ (SE)    | p     | $\beta$ (SE)     | p    |               |
| <b>Model 1</b>                    |                 |       |                  |      |               |
| $\Delta$ Triglycerides, mg/dL     | 7.81 (6.18)     | 0.21  | 1.12 (5.93)      | 0.85 | 0.51          |
| $\Delta$ Total cholesterol, mg/dL | -4.70 (2.77)    | 0.09  | 4.24 (2.81)      | 0.13 | 0.02          |
| $\Delta$ LDL cholesterol, mg/dL   | -6.59 (2.25)    | 0.004 | 3.51 (2.30)      | 0.13 | 0.002         |
| $\Delta$ HDL cholesterol, mg/dL   | 0.87 (0.72)     | 0.23  | 0.30 (0.79)      | 0.70 | 0.55          |
| <b>Model 2</b>                    |                 |       |                  |      |               |
| $\Delta$ Triglycerides, mg/dL     | 11.1 (5.91)     | 0.06  | 0.19 (5.69)      | 0.97 | 0.25          |
| $\Delta$ Total cholesterol, mg/dL | -4.15 (2.78)    | 0.14  | 4.16 (2.81)      | 0.14 | 0.02          |
| $\Delta$ LDL cholesterol, mg/dL   | -6.13 (2.26)    | 0.007 | 3.44 (2.31)      | 0.14 | 0.003         |
| $\Delta$ HDL cholesterol, mg/dL   | 0.44 (0.68)     | 0.52  | 0.45 (0.74)      | 0.54 | 0.98          |

Data were calculated by using linear regression models. The interaction term was included in the models to test gene-diet interactions.  $\beta$  represents changes in outcomes for the increasing number of G allele of the rs10830963 variant

Model 1: Adjusted for age, gender, ethnicity, BMI at baseline, the respective baseline variable and lipid-lowering medication use

Model 2: Adjusted for age, gender, ethnicity, BMI at baseline, the respective baseline variable, lipid-lowering medication use and body weight loss at each intervention time
